# Supplementary material for: A mechanism for the extension and unfolding of parallel telomeric G-quadruplexes by human telomerase at single-molecule resolution
Source: eLife journal article supplement (doi:10.7554/elife.56428), 2020-07-29
Supplement: supp [file elife-56428-supp-v1.zip]

Archive with 34 entries (34 files):
- elife_poa_e56428_Transparent_Reporting_File.pdf
- elife_poa_e56428_Figure_2_figure_supplement_1.ai
- elife_poa_e56428_Figure_2_figure_supplement_2.ai
- elife_poa_e56428_Figure_2_figure_supplement_3.ai
- elife_poa_e56428_Figure_2_figure_supplement_4.ai
- elife_poa_e56428_Figure_3_figure_supplement_1.ai
- elife_poa_e56428_Figure_4_figure_supplement_1.ai
- elife_poa_e56428_Figure_4_figure_supplement_2.ai
- elife_poa_e56428_Figure_4_figure_supplement_3.ai
- elife_poa_e56428_Figure_4_figure_supplement_4.ai
- elife_poa_e56428_Figure_5_figure_supplement_1.ai
- elife_poa_e56428_Figure_5_figure_supplement_2.ai
- elife_poa_e56428_Figure_6_figure_supplement_1.ai
- elife_poa_e56428_Figure_6_figure_supplement_2.ai
- elife_poa_e56428_Figure_6_figure_supplement_3.ai
- elife_poa_e56428_Figure_7_figure_supplement_1.ai
- elife_poa_e56428_Figure_7_figure_supplement_2.ai
- elife_poa_e56428_Figure_7_figure_supplement_3.ai
- elife_poa_e56428_Figure_7_figure_supplement_4.ai
- elife_poa_e56428_Figure_7_figure_supplement_5.ai
- elife_poa_e56428_Figure_8_figure_supplement_1.ai
- elife_poa_e56428_Figure_8_figure_supplement_2.ai
- elife_poa_e56428_Figure_9_figure_supplement_1.ai
- elife_poa_e56428_Figure_9_figure_supplement_2.ai
- elife_poa_e56428_Figure_9_figure_supplement_3.ai
- elife_poa_e56428_Supplementary_file_1.docx
- elife_poa_e56428_Figure_2_source_data_1.xlsx
- elife_poa_e56428_Figure_4_source_data_1.xlsx
- elife_poa_e56428_Figure_5_source_data_1.xlsx
- elife_poa_e56428_Figure_5_source_data_2.xlsx
- elife_poa_e56428_Figure_6_source_data_1.xlsx
- elife_poa_e56428_Figure_6_source_data_2.xlsx
- elife_poa_e56428_Figure_7_source_data_1.xlsx
- elife_poa_e56428_Figure_9_source_data_1.xlsx
