# Supplementary material for: A mechanism for the extension and unfolding of parallel telomeric G-quadruplexes by human telomerase at single-molecule resolution
Source: eLife journal article supplement (doi:10.7554/elife.56428), 2020-07-29
Supplement: supp [file elife-56428-supp-v1.zip › elife_poa_e56428_Figure_2_source_data_1.xlsx]

## Sheet: Fig 2C
			no FRET drop molecules			Percentage	Error	1st FRET drop		Percentage	Error	2nd FRET drop		Percentage	Error		Total
22G3				94		95	9.79329	3		3	1.74955	2		2	1.4285		99
Tel				58		32	4.13901	120		65	5.95351	6		3	1.33124		184
Tel, dNTPs				48		35	5.02044	4		3	1.44928	86		62	6.72001		138
