# Supplementary material for: A mechanism for the extension and unfolding of parallel telomeric G-quadruplexes by human telomerase at single-molecule resolution
Source: eLife journal article supplement (doi:10.7554/elife.56428), 2020-07-29
Supplement: supp [file elife-56428-supp-v1.zip › elife_poa_e56428_Figure_5_source_data_1.xlsx]

## Sheet: Fig 5E
			no FRET drop molecules			Percentage	Error	1st FRET drop		Percentage	Error	2nd FRET drop		Percentage	Error		Total
[7GGT]4				100		95	9.52381	3		3	1.64957	2		2	1.34687		105
D712A-tel				53		40	5.47377	77		58	6.59772	2		2	1.06332		133
D712A-Tel, dNTPs				54		42	5.69649	71		55	6.5319	4		3	1.55039		129
