# Supplementary material for: A mechanism for the extension and unfolding of parallel telomeric G-quadruplexes by human telomerase at single-molecule resolution
Source: eLife journal article supplement (doi:10.7554/elife.56428), 2020-07-29
Supplement: supp [file elife-56428-supp-v1.zip › elife_poa_e56428_Figure_5_source_data_2.xlsx]

## Sheet: Fig 5J
			no FRET drop molecules			Percentage	Error	1st FRET drop		Percentage	Error	2nd FRET drop		Percentage	Error		Total
[7GGT]4				100		95	9.52381	3		3	1.64957	2		2	1.34687		105
RNA.10C				58		45	5.9037	62		48	6.10388	9		7	2.32558		129
DNA.10C				89		94	9.93051	1		1	1.05263	5		5	2.35376		95
