# Supplementary material for: A mechanism for the extension and unfolding of parallel telomeric G-quadruplexes by human telomerase at single-molecule resolution
Source: eLife journal article supplement (doi:10.7554/elife.56428), 2020-07-29
Supplement: supp [file elife-56428-supp-v1.zip › elife_poa_e56428_Figure_6_source_data_1.xlsx]

## Sheet: Fig 6-supp 1
			no FRET drop molecules			Percentage	Error	1st FRET drop		Percentage	Error	2nd FRET drop		Percentage	Error		Total
22G3				94		95	9.79329	3		3	1.74955	2		2	1.4285		99
22G3, tel, ddTTP				41		34	5.29184	73		60	7.06116	7		6	2.18657		121
22G3, tel, dTTP, ddATP				51		36	5.10102	81		58	6.42857	8		6	2.02031		140
22G3, tel, dTTP, dATP, ddGTP				54		40	5.36385	10		7	2.30823	73		53	6.2365		137
