# Supplementary material for: A mechanism for the extension and unfolding of parallel telomeric G-quadruplexes by human telomerase at single-molecule resolution
Source: eLife journal article supplement (doi:10.7554/elife.56428), 2020-07-29
Supplement: supp [file elife-56428-supp-v1.zip › elife_poa_e56428_Figure_6_source_data_2.xlsx]

## Sheet: Fig 6-supp 3
			no FRET drop molecules			Percentage	Error	1st FRET drop		Percentage	Error	2nd FRET drop		Percentage	Error		Total
[7GGT]4				100		95	9.52381	3		3	1.64957	2		2	1.34687		105
Tel, ddTP				62		46	5.8326	70		52	6.19748	3		2	1.283		135
Tel TTP, ddATP				57		42	5.55135	75		55	6.36783	4		3	1.47059		136
Tel, dTTP, dATP, ddGTP				50		38	5.35687	13		10	2.73148	69		52	6.2929		132
