# Supplementary material for: A mechanism for the extension and unfolding of parallel telomeric G-quadruplexes by human telomerase at single-molecule resolution
Source: eLife journal article supplement (doi:10.7554/elife.56428), 2020-07-29
Supplement: supp [file elife-56428-supp-v1.zip › elife_poa_e56428_Figure_7_source_data_1.xlsx]

## Sheet: Fig 7J
			no FRET drop molecules			Percentage		1st FRET drop		Percentage	Error	2nd FRET drop		Percentage	Error		Total
22G3				94		95	9.79329	3		3	1.74955	2		2	1.4285		99
Tel, dNTPs				48		35	5.02044	4		3	1.44928	86		62	6.72001		138
22G3 NMM				105		95	9.31541	5		5	2.03279	0		0	0		110
22G3 NMM tel dNTPs				63		63	7.93725	9		9	3	28		28	5.2915		100
22G3 SST16				90		94	9.88212	6		6	2.55155	0		0	0		96
22G3 SST16 tel dNTPs				83		58	6.37093	16		11	2.7972	44		31	4.63864		143
22G3 PhenDC3				75		96	10.8253	5		4	2.79508	0		0	0		80
22G3 PhhenDC3, tel, dNTPs				136		64	5.47507	9		4	1.40845	68		32	3.87146		213
