# Supplementary material for: A mechanism for the extension and unfolding of parallel telomeric G-quadruplexes by human telomerase at single-molecule resolution
Source: eLife journal article supplement (doi:10.7554/elife.56428), 2020-07-29
Supplement: supp [file elife-56428-supp-v1.zip › elife_poa_e56428_Figure_9_source_data_1.xlsx]

## Sheet: Fig 9J
			no FRET drop			Percentage	Error	1st FRET drop		Percentage	Error	2nd FRET drop		Percentage	Error		Total
[7GGT]4				100		95	9.52381	3		3	1.64957	2		2	1.34687		105
Tel				40		35	5.49961	69		60	7.22315	6		5	2.12999		115
Tel, dNTPs				54		40	5.44331	6		5	1.81444	74		55	6.37209		135
NMM, Tel				69		46	5.53775	75		50	5.7735	6		4	1.63299		150
NMM, Tel, dNTPs				74		47	5.58593	3		2	1.12471	78		51	5.73491		154
SST16, Tel				55		42	5.66122	72		55	6.47731	4		3	1.52672		131
SST16, Tel, dNTPs				55		38	5.11462	6		4	1.6893	84		58	6.32079		145
PhenDC3, tel				94		56	5.77105	66		39	4.83574	8		5	1.68359		168
PhenDC3, tel, dNTPs				79		51	5.73432	6		4	1.58032	70		45	5.39781		155
